# Supplementary material
Source: publisher figshare collection journal article supplement (https://frontiersin.figshare.com/ndownloader/files/22052835)
Supplement: Supplementary file 1 [file 22052835]

**Supplemental Table 2. Error matrix for LULC change map accuracy assessment. For LULC change class descriptions, see Table 2.**

| **Test Map Class #** | **Reference Map Class #** | | | | | | | | | | | | | | | | | | | | | | | | | | | | | | **Total** |
| --- | --- | --- | --- | --- | --- | --- | --- | --- | --- | --- | --- | --- | --- | --- | --- | --- | --- | --- | --- | --- | --- | --- | --- | --- | --- | --- | --- | --- | --- | --- | --- |
| **11** | **28** | **32** | **33** | **34** | **35** | **36** | **37** | **38** | **39** | **43** | **44** | **45** | **46** | **47** | **53** | **54** | **55** | **56** | **62** | **63** | **64** | **65** | **66** | **67** | **73** | **74** | **75** | **76** | **77** |
| **11** | **1** |  |  |  |  |  |  |  |  |  |  |  |  |  |  |  |  |  |  |  |  |  |  |  |  |  |  |  |  |  | **1** |
| **28** |  | **0** |  |  |  |  |  |  |  |  |  |  |  |  |  |  |  |  |  |  |  |  |  |  |  |  |  |  |  |  | **0** |
| **32** |  |  | **0** | **1** |  |  |  |  |  |  |  |  |  |  |  |  |  |  |  |  |  |  |  |  |  |  |  |  |  |  | **1** |
| **33** |  |  |  | **56** |  | **2** |  |  | **1** | **1** |  |  |  |  |  |  |  | **1** |  | **1** |  |  |  |  |  |  |  |  |  |  | **62** |
| **34** |  |  |  |  | **0** |  |  |  |  |  |  | **1** |  |  |  |  |  |  |  |  |  |  |  |  |  |  |  |  |  |  | **1** |
| **35** |  | **1** |  | **2** |  | **2** |  |  | **2** |  |  |  |  |  |  |  |  |  |  |  |  |  |  |  |  |  |  |  |  |  | **7** |
| **36** |  |  |  | **1** |  |  | **1** |  |  |  |  |  |  |  |  |  |  |  |  |  |  |  |  | **1** |  |  |  |  | **1** |  | **4** |
| **37** |  |  |  |  |  |  |  | **0** |  |  |  |  |  |  |  |  |  |  |  |  |  |  |  |  |  |  |  |  |  | **2** | **2** |
| **38** |  |  |  |  |  |  |  |  | **1** |  |  |  |  |  |  |  |  |  |  |  |  |  |  |  |  |  |  |  |  |  | **1** |
| **39** |  |  |  |  |  |  |  |  |  | **0** |  |  |  |  |  |  |  |  |  |  |  |  |  |  |  |  |  |  |  |  | **0** |
| **43** |  |  |  | **1** |  |  |  |  |  |  | **1** |  |  |  |  |  |  |  |  |  |  |  |  |  |  |  |  |  |  |  | **2** |
| **44** |  |  |  |  |  |  |  |  |  |  |  | **0** |  |  |  |  |  |  |  |  |  |  |  |  |  |  |  |  | **1** |  | **1** |
| **45** |  |  |  |  |  |  |  |  |  |  |  |  | **1** |  | **1** |  |  |  |  |  |  |  |  |  |  |  |  |  |  |  | **2** |
| **46** |  |  |  |  |  |  |  |  |  |  |  |  |  | **0** |  |  |  |  | **1** |  |  |  |  |  |  |  |  |  | **1** | **1** | **3** |
| **47** |  |  |  |  |  |  |  |  |  |  |  |  |  |  | **0** |  |  |  |  |  |  |  |  |  |  |  |  |  |  | **3** | **3** |
| **53** |  |  |  | **1** |  |  |  |  |  |  |  |  |  |  |  | **0** |  |  |  |  |  |  |  |  |  |  |  |  |  |  | **1** |
| **54** |  |  |  |  |  |  |  |  |  |  |  |  |  |  |  |  | **0** |  |  |  |  |  |  |  |  |  |  |  |  |  | **0** |
| **55** |  |  |  |  |  |  |  |  |  |  |  |  |  |  |  |  |  | **0** |  |  |  |  |  |  |  |  |  |  |  |  | **0** |
| **56** |  |  |  |  |  |  | **1** |  |  |  |  |  |  |  |  |  |  |  | **0** |  |  |  |  |  |  |  |  |  | **1** |  | **2** |
| **62** |  |  |  |  |  |  |  |  |  |  |  |  |  |  |  |  |  |  |  | **0** |  |  |  |  |  |  |  |  |  |  | **0** |
| **63** |  |  |  |  |  |  |  |  |  |  |  |  |  |  |  | **1** |  |  |  |  | **3** | **1** |  |  |  |  |  |  |  |  | **5** |
| **64** |  |  |  |  |  |  |  |  |  |  |  |  |  |  |  |  |  |  |  |  |  | **0** |  | **2** |  |  |  |  |  |  | **2** |
| **65** |  |  |  |  |  |  |  |  |  |  |  |  |  |  |  |  |  |  |  |  |  |  | **2** |  |  |  |  |  |  |  | **2** |
| **66** |  |  |  |  |  |  |  |  |  |  |  |  |  |  |  |  |  |  |  |  |  |  |  | **9** |  |  |  |  | **1** | **1** | **11** |
| **67** |  |  |  |  |  |  |  |  |  |  |  |  |  |  |  |  |  |  |  |  |  |  |  |  | **2** |  |  |  |  |  | **2** |
| **73** |  |  |  |  |  |  |  |  |  |  |  |  |  |  |  |  |  |  |  |  | **1** |  |  |  |  | **2** |  |  |  |  | **3** |
| **74** |  |  |  |  |  |  |  |  |  |  |  |  |  |  |  |  |  |  |  |  |  |  |  |  |  |  | **4** |  |  |  | **4** |
| **75** |  |  |  |  |  |  |  |  |  |  |  |  |  |  |  |  |  |  |  |  |  |  |  | **1** |  |  |  | **4** |  | **1** | **6** |
| **76** |  |  |  |  |  |  |  |  |  |  |  |  |  |  |  |  |  |  |  |  |  |  |  | **2** |  |  |  |  | **13** | **3** | **18** |
| **77** |  |  |  |  |  |  |  |  |  |  |  |  |  |  | **1** |  |  |  |  |  |  |  |  |  |  |  | **1** | **1** |  | **64** | **67** |
| **Total** | **1** | **1** | **0** | **62** | **0** | **4** | **2** | **0** | **4** | **1** | **1** | **1** | **1** | **0** | **2** | **1** | **0** | **1** | **1** | **1** | **4** | **1** | **2** | **15** | **2** | **2** | **5** | **5** | **18** | **75** | **213** |
